# Supplementary material
Source: PubMed Central journal article supplement (PMC3421824)
Supplement: JCM.06752-11_zjm999091872so1.pdf [file JCM.06752-11_zjm999091872so1.pdf]

**Supplementary table 1.** Available sequences of primers and hydrolysis probes used in this study.

| Type of assay            | Sequence (5' to 3')*                     |                                         |                         |
|--------------------------|------------------------------------------|-----------------------------------------|-------------------------|
|                          | Forward primer(s)                        | Probe                                   | Reverse primer          |
| Panenterhino/Ge/08 assay | AGCCTGCGTGGCKGCC<br>CYlnaAGCClnaTGCGTGG3 | FAM-CTCCGGCCCTGAATGYGGCTAA-TAMRA        | GAAACACGGACACCCAAAGTAGT |
| CDV assay                | GCTACCCAAGAAACCGTCATTG                   | VIC-CG TTCAGGGAGTCCAGGACTACGTCAAC-TAMRA | GCATGGCAGGGACGAGTT      |
| HRV-A16-specific assay   | GACAAAGAAACCATCTCAAATGCA                 | FAM-AGCATGTCTTATCCTTG                   | GACCATTGTGCCACATTAAGTGA |

\* K=G or T; Y=C or T; ln, locked nucleic acid.

**Supplementary table 2.** One-step versus two-step HRV RNA quantification by real-time RT-PCR in respiratory specimens.

| Specimen   | Genotype | Log (RNA copies/ml) |      |      |          |      |      | Two-step minus one-step | One-step/two-step % CV |
|------------|----------|---------------------|------|------|----------|------|------|-------------------------|------------------------|
|            |          | One-step            |      |      | Two-step |      |      |                         |                        |
|            |          | Exp1                | Exp2 | Mean | Exp1     | Exp2 | Mean |                         |                        |
| L45-1009-U | HRV-A1   | 5.99                | 6.02 | 6    | 5.54     | 6.14 | 5.84 | -0.17                   | 0.11                   |
| M65-1008-U | HRV-C    | 5.34                | 5.3  | 5.32 | 5.75     | 5.87 | 5.81 | 0.49                    | 0.35                   |
| H71-0110-U | HRV-C    | 4.7                 | 5.08 | 4.89 | 5.73     | 5.99 | 5.86 | 0.97                    | 0.69                   |
| M55-0110-U | HRV-C    | 5.64                | 5.75 | 5.7  | 6.41     | 6.61 | 6.51 | 0.82                    | 0.57                   |
| J56-1209-U |          | 6.79                | 6.74 | 6.77 | 7.34     | 7.7  | 7.52 | 0.75                    | 0.53                   |
| F61-1209-U | HRV-C    | 7.51                | 7.4  | 7.45 | 7.06     | 7.49 | 7.28 | -0.18                   | 0.12                   |
| T53-0110-U | HRV-A7   | 6.76                | 6.59 | 6.68 | 6.65     | 6.97 | 6.81 | 0.14                    | 0.09                   |
| C75-0109-U | HRV-C    | 5.15                | 5.31 | 5.23 | 5.43     | 5.85 | 5.64 | 0.41                    | 0.29                   |
| B53-0510-U |          | 5.37                | 6.72 | 6.04 | 5.76     | 6.1  | 5.93 | -0.12                   | 0.08                   |
| G49-1008-U | HRV-A9   | 5.72                | 5.5  | 5.61 | 5.44     | 5.84 | 5.64 | 0.03                    | 0.02                   |
| S39-0908-U | HRV-A58  | 5.71                | 5.38 | 5.55 | 5.58     | 6.09 | 5.84 | 0.29                    | 0.21                   |
| F78-1008-U |          | 5.02                | 6.5  | 5.76 | 4.8      | 5.61 | 5.21 | -0.56                   | 0.39                   |
| D47-0209-U | HRV-C    | 5.46                | 5.75 | 5.6  | 5.23     | 6.29 | 5.76 | 0.15                    | 0.11                   |
| G82-0309-U | HRV-C    | 6.42                | 6.13 | 6.28 | 7.05     | 7.41 | 7.23 | 0.96                    | 0.67                   |
| M65-0109-U | HRV-C    | 6                   | 6.71 | 6.36 | 5.46     | 7.15 | 6.3  | -0.05                   | 0.04                   |
| C41-0909-U | HRV-A20  | 6.51                | 6.35 | 6.43 | 6.76     | 6.94 | 6.85 | 0.42                    | 0.3                    |
| C47-1009-U | HRV-A10  | 5.58                | 5.28 | 5.43 | 5.59     | 5.83 | 5.71 | 0.28                    | 0.2                    |
| S68-0909-U | HRV-A68  | 6.28                | 5.97 | 6.13 | 6.65     | 6.9  | 6.77 | 0.65                    | 0.45                   |
| M41-1108-U | HRV-A51  | 5.41                | 4.96 | 5.19 | 5.31     | 5.58 | 5.45 | 0.26                    | 0.18                   |
| B53-1109-U | HRV-A62  | 5.85                | 5.91 | 5.88 | 5.3      | 6.15 | 5.72 | -0.16                   | 0.11                   |
| B53-1209-U | HRV-A62  | 4.98                | 4.94 | 4.96 | 5.07     | 5.32 | 5.2  | 0.23                    | 0.17                   |
| C70-0510-U |          | 6.65                | 6.72 | 6.68 | 5.49     | 5.86 | 5.67 | -1.01                   | 0.71                   |
| G44-0410-U |          | 5.95                | 6.05 | 6    | 6.4      | 6.87 | 6.64 | 0.64                    | 0.45                   |
| B53-0410-U |          | 5.53                | 5.71 | 5.62 | 5.5      | 6.28 | 5.89 | 0.27                    | 0.19                   |
| V74-0510-U |          | 6.78                | 6.93 | 6.86 | 7.37     | 7.69 | 7.53 | 0.68                    | 0.47                   |
| C67-0410-U |          | 5.07                | 5.29 | 5.18 | 5.4      | 5.97 | 5.68 | 0.51                    | 0.35                   |
| C67-0410-U |          | 5.26                | 5.31 | 5.29 | 5.82     | 6.07 | 5.94 | 0.66                    | 0.46                   |
| D46-0410-U |          | 5.18                | 5.22 | 5.2  | 4.73     | 5.28 | 5    | -0.19                   | 0.14                   |
| G49-0410-U |          | 4.72                | 4.79 | 4.75 | 5.15     | 5.62 | 5.38 | 0.63                    | 0.45                   |
| B54-0710-U |          | 5.94                | 6.17 | 6.06 | 5.91     | 6.34 | 6.13 | 0.07                    | 0.05                   |
| A77-0810-U |          | 5.78                | 5.08 | 5.43 | 6.04     | 5.75 | 5.9  | 0.47                    | 0.33                   |
| B55-0910-U |          | 5.5                 | 5.58 | 5.54 | 5.64     | 6.17 | 5.91 | 0.36                    | 0.26                   |
| V74-1010-U |          | 5.51                | 5.82 | 5.66 | 4.86     | 5.27 | 5.07 | -0.6                    | 0.42                   |
| M41-1010-U |          | 4.87                | 4.97 | 4.92 | 4.73     | 5.19 | 4.96 | 0.04                    | 0.03                   |
| B55-1010-U |          | 4.45                | 4.43 | 4.44 | 4.47     | 4.66 | 4.57 | 0.13                    | 0.09                   |
| J63-0111-U |          | 4.5                 | 4.52 | 4.51 | 5.09     | 5.75 | 5.42 | 0.91                    | 0.64                   |
| J56-1209-U |          | 4.65                | 4.66 | 4.66 | 4.31     | 4.85 | 4.58 | -0.08                   | 0.06                   |
| H88-1210-U |          | 6.2                 | 5.95 | 6.08 | 6.5      | 6.31 | 6.4  | 0.33                    | 0.23                   |
| G44-0111-U |          | 6.43                | 6.8  | 6.61 | 6.97     | 5.06 | 6.01 | -0.6                    | 0.42                   |
| H88-0810-U |          | 4.39                | 4.81 | 4.6  | 4.8      | 5.64 | 5.22 | 0.62                    | 0.44                   |

|            |         |      |      |      |      |      |      |       |      |
|------------|---------|------|------|------|------|------|------|-------|------|
| C67-0908-U | HRV-B6  | 5.17 | 5.32 | 5.24 | 4.98 | 5.45 | 5.22 | -0.03 | 0.01 |
| B68-0509-U | HRV-C   | 5.91 | 6    | 5.96 | 4.96 | 5.44 | 5.2  | -0.76 | 0.54 |
| M41-0909-U |         | 6.64 | 6.76 | 6.7  | 6.61 | 7.27 | 6.94 | 0.24  | 0.17 |
| B53-0210-U | HRV-A62 | 5.12 | 5.07 | 5.1  | 4.94 | 5.99 | 5.46 | 0.37  | 0.25 |
| M65-0109-L |         | 5.23 | 5.24 | 5.24 | 4.97 | 4.59 | 4.78 | -0.46 | 0.33 |
| F78-1008-L |         | 7.36 | 7.5  | 7.43 | 6.94 | 7.06 | 7    | -0.43 | 0.3  |
| C47-1009-L | HRV-A10 | 5.75 | 5.83 | 5.79 | 5.7  | 6.02 | 5.86 | 0.07  | 0.05 |
| B54-0710-L |         | 7.34 | 7.43 | 7.38 | 7.25 | 7.58 | 7.42 | 0.03  | 0.03 |
| B53-0510-L |         | 5.56 | 5.84 | 5.7  | 5.22 | 5.52 | 5.37 | -0.33 | 0.23 |
| M41-0710-L |         | 5.63 | 5.88 | 5.76 | 4.99 | 5.43 | 5.21 | -0.55 | 0.39 |

Specimens are designated by the first letter of their last name followed by the last two numbers of their birth year (eg. B48), the month and year of sample collection (eg. 0209), and the site of sampling (U, upper respiratory tract; L, lower respiratory tract).

HRV species and genotype are indicated when sequences are available.

**Supplementary Table 3.** Inter-assay variability and difference in cell amount analyzed in 12 respiratory samples.

| Specimen   | Inter-assay variability     |      |      |                             |      |       | Estimation of sample cell content |                    |                       |
|------------|-----------------------------|------|------|-----------------------------|------|-------|-----------------------------------|--------------------|-----------------------|
|            | One-step log(RNA copies/ml) |      |      | Two-step log(RNA copies/ml) |      |       | Panente-rhino/Ge/08 mean Ct value | GAPDH RNA Ct value | CELL control Ct value |
|            | Exp1                        | Exp2 | %CV  | Exp1                        | Exp2 | %CV   |                                   |                    |                       |
| M65-1008-U | 5.34                        | 5.31 | 0.37 | 5.75                        | 5.58 | 2.08  | 31.06                             | 34.99              | 32.8                  |
| J56-1209-U | 6.79                        | 6.57 | 2.35 | 7.34                        | 7.48 | 1.31  | 26.53                             | 32.35              | 29.42                 |
| F61-1209-U | 7.51                        | 7.31 | 1.89 | 7.06                        | 8.00 | 8.84  | 23.85                             | 36.12              | 29.81                 |
| T53-0110-U | 6.76                        | 6.48 | 2.96 | 6.65                        | 7.21 | 5.67  | 26.68                             | 36.7               | 29.49                 |
| G49-1008-U | 5.72                        | 5.61 | 1.29 | 5.44                        | 6.21 | 9.32  | 30.18                             | 37.33              | 31.76                 |
| M65-0109-U | 6                           | 5.69 | 3.75 | 5.46                        | 6.33 | 10.42 | 29.86                             | 34.32              | 32.95                 |
| M41-1108-U | 5.41                        | 5.14 | 3.56 | 5.31                        | 5.74 | 5.53  | 31.68                             | 34.88              | 31.44                 |
| B53-1109-U | 5.85                        | 5.89 | 0.43 | 5.30                        | 6.46 | 13.98 | 29.1                              | 35.28              | 31.53                 |
| G49-0410-U | 4.72                        | 4.87 | 2.22 | 5.15                        | 5.64 | 6.44  | 35.75                             | 34.15              | 33.93                 |
| B54-0710-U | 5.94                        | 5.96 | 0.25 | 5.91                        | 6.41 | 5.73  | 28.44                             | Undetected         | 33.83                 |
| H88-0810-U | 4.39                        | 4.58 | 3.04 | 4.80                        | 5.38 | 8.11  | 38.83                             | 35.15              | 28.57                 |
| B54-0710-L | 7.34                        | 7.62 | 2.65 | 7.25                        | 7.67 | 3.97  | 22.85                             | 32.13              | 29.58                 |

Columns 2 to 7: one-step and two-step inter-assay variation in HRV RNA quantification.

Columns 8 to 10: housekeeping gene GAPDH Ct, and CELL control r-gene Ct values.

**Supplementary Table 4.** Genetic variability-related variation in HRV nucleic acid

quantification expressed in % CV without taking into account (A) and taking into account (B) an HEV 5'UTR sequence.

**A.**

| Plasmid dilution<br>(copies/reaction) | Log (copies/ml) |                 |                | %CV  | Mean<br>% CV |
|---------------------------------------|-----------------|-----------------|----------------|------|--------------|
|                                       | HRV-A16         | HRV-<br>B37/A16 | HRV-<br>Ca/A16 |      |              |
| 1000000                               | 8.25            | 8.55            | 8.13           | 2.57 | 5.22         |
| 100000                                | 7.08            | 7.56            | 7              | 4.23 |              |
| 10000                                 | 5.96            | 6.57            | 5.96           | 5.71 |              |
| 1000                                  | 4.97            | 5.41            | 4.84           | 5.88 |              |
| 100                                   | 4.11            | 4.28            | 3.68           | 7.69 |              |

**B.**

| Plasmid dilution<br>(copies/reaction) | Log (copies/ml) |                 |                |                 | % CV | Mean<br>% CV |
|---------------------------------------|-----------------|-----------------|----------------|-----------------|------|--------------|
|                                       | HRV-A16         | HRV-<br>B37/A16 | HRV-<br>Ca/A16 | HEV-<br>A71/A16 |      |              |
| 1000000                               | 8.25            | 8.55            | 8.13           | 7.48            | 5.58 | 6.98         |
| 100000                                | 7.08            | 7.56            | 7              | 6.37            | 7.01 |              |
| 10000                                 | 5.96            | 6.57            | 5.96           | 5.34            | 8.44 |              |
| 1000                                  | 4.97            | 5.41            | 4.84           | 4.51            | 7.52 |              |
| 100                                   | 4.11            | 4.28            | 3.68           | 3.95            | 6.38 |              |

HRV-16: plasmid encoding a full-length HRV-A16 genome.

HRV-B37/A16: plasmid encoding an HRV-B37 5'UTR in an HRV-A16 background.

HRV-Ca/A16: plasmid encoding an HRV-Ca 5'UTR in an HRV-A16 background.

HEV-A71/A16: plasmid encoding an HEV-A71 5'UTR in an HRV-A16 background.
